# Supplementary material for: The proline–arginine repeat protein linked to C9-ALS/FTD causes neuronal toxicity by inhibiting the DEAD-box RNA helicase-mediated ribosome biogenesis
Source: PubMed Central journal article supplement (PMC6155127; doi:10.1038/s41419-018-1028-5), 2018-09-24
Supplement: 41419_2018_1028_MOESM1_ESM.pdf [file 41419_2018_1028_MOESM1_ESM.pdf]

## Supplementary information

**Fig. S1 Poly-PR binds to mature rRNA species.**

**a**

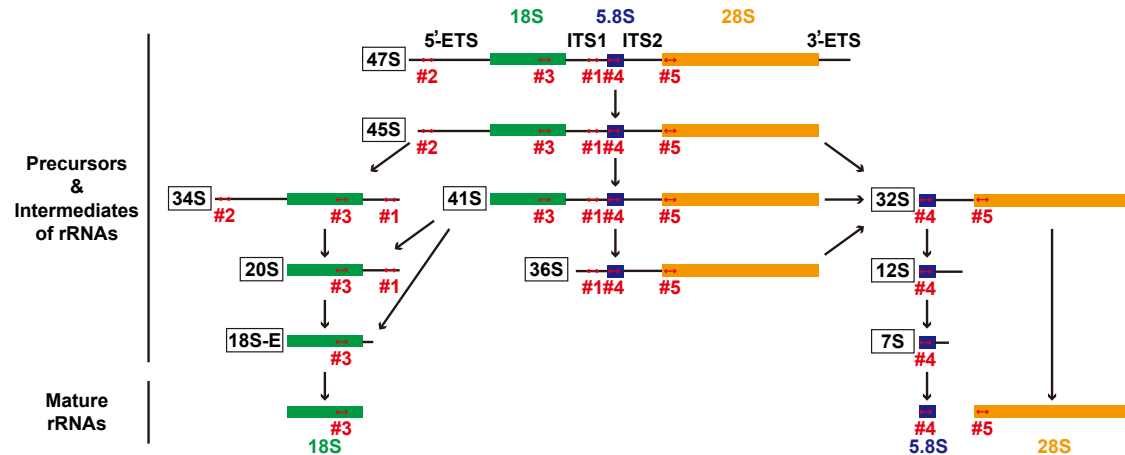

**a** Overview of pre-rRNA processing and priming sites used in RNA immunoprecipitation (RIP) assays. Major precursors and intermediates of mouse rRNA that are transcribed by RNA polymerase I are depicted. 5S rRNA is generated by RNA polymerase III (not shown here). Mature 18S, 5.8S, and 28S rRNA are separated by the internal transcribed spacer 1 (ITS1) and ITS2 and are flanked by the 5'-external transcribed spacer (5'-ETS) and 3'-ETS. Ribosomal RNA is initially transcribed as a full-length precursor (47S) that is rapidly processed to generate 45S pre-rRNA. Multiple precursors and intermediates are then endonucleolytically and exonucleolytically processed in a stepwise fashion. Priming sites used in the RIP assay are shown in red-letter. The annealing positions of primer sets-#1 and -#2 are located within ITS1 and 5'-ETS, respectively. The annealing positions of primer sets-#3, -#4, and -#5 are located within mature 18S, 5.8S, and 28S rRNA, respectively.

**b**

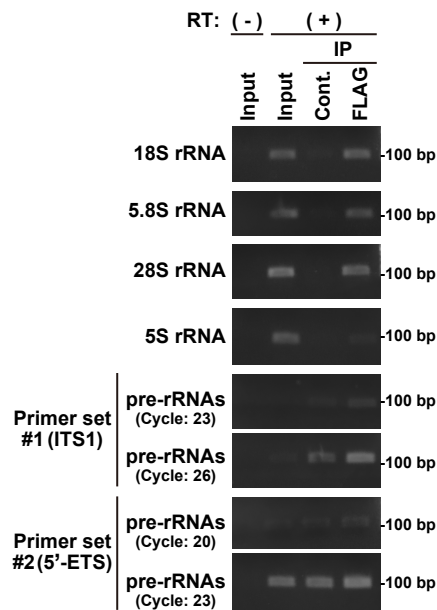

**b** FLAG-PR100 binds to 18S, 5.8S, 28S, and 5S rRNA, but not pre-rRNAs. NSC-34 cells were transfected with the FLAG-PR100-encoding vector. At 48 h after the transfection, the cell lysates were immunoprecipitated (IP) with normal mouse IgG (Cont.) or the FLAG antibody. Precipitates were then used for RIP assays. RT (-) was used as negative control to monitor the PCR amplification from genomic DNA. Mature 18S, 5.8S, and 28S rRNA were amplified with primer sets-#3, -#4, and -#5, respectively. Pre-rRNAs are amplified with the primer sets-#1 and -#2 (Fig. S1a). Mature 18S, 5.8S, 28S, and 5S rRNA, co-precipitated with FLAG-PR100, were amplified in the FLAG antibody immunoprecipitates, whereas the background binding of pre-rRNAs to FLAG-PR100 and control IgG gave rise to the nearly similar background amplification of pre-rRNAs in advanced PCR cycles using both primer sets-#1 and -#2.

**Table S1**

**A summary of candidates of poly-PR-binding protein that may localize in the nucleolus**

| Band No. | Protein name                                                         | Accession | Total score | Sequence coverage (%) | No. of peptides matched |
|----------|----------------------------------------------------------------------|-----------|-------------|-----------------------|-------------------------|
| 2        | ATP-dependent RNA helicase A (Dhx9)                                  | O70133    | 46.7        | 22.1                  | 27                      |
|          | Myb-binding protein 1A                                               | Q77PV4    | 35.8        | 17.8                  | 19                      |
| 5        | Poly [ADP-ribose] polymerase 1                                       | P11103    | 71.6        | 34.3                  | 49                      |
| 6        | Nucleolar protein 14                                                 | Q8R3N1    | 4.2         | 5.0                   | 3                       |
|          | DNA topoisomerase 1                                                  | Q04750    | 10.0        | 8.6                   | 5                       |
| 7        | <b>Nucleolar RNA helicase 2 (Ddx21)</b>                              | Q9JIK5    | 8.4         | 5.3                   | 4                       |
|          | Nucleolin                                                            | P09405    | 29.5        | 18.5                  | 16                      |
| 9        | <b>ATP-dependent RNA helicase DDX18</b>                              | Q8K363    | 14.0        | 13.0                  | 7                       |
|          | Fragile X mental retardation protein 1 homolog                       | P35922    | 12.6        | 16.0                  | 8                       |
| 10       | Nucleolar GTP-binding protein 1                                      | Q99ME9    | 6.1         | 4.6                   | 3                       |
|          | <b>Probable ATP-dependent RNA helicase DDX17</b>                     | Q501J6    | 3.5         | 4.9                   | 3                       |
|          | <b>Probable ATP-dependent RNA helicase DDX5</b>                      | Q61656    | 5.3         | 6.5                   | 4                       |
| 11       | RNA-binding protein 14                                               | Q8C2Q3    | 12.3        | 11.8                  | 7                       |
|          | Stress-70 protein, mitochondrial                                     | P38647    | 28.7        | 28.9                  | 17                      |
| 12       | H/ACA ribonucleoprotein complex subunit 4                            | Q9ESX5    | 3.1         | 6.9                   | 2                       |
|          | Non-POU domain-containing octamer-binding protein                    | Q99K48    | 14.4        | 22.0                  | 8                       |
| 13       | Cell growth-regulating nucleolar protein                             | Q08288    | 4.0         | 9.3                   | 2                       |
| 14       | Elongation factor 1-alpha 1                                          | P10126    | 44.0        | 43.5                  | 34                      |
|          | KRR1 small subunit processome component homolog                      | Q8BGA5    | 7.3         | 11.8                  | 4                       |
| 15       | Complement component 1 Q subcomponent-binding protein, mitochondrial | O35658    | 24.5        | 54.0                  | 31                      |
|          | mRNA turnover protein 4 homolog                                      | Q9D0I8    | 10.6        | 25.9                  | 5                       |

Proteins in bold type belong to DEAD-box RNA helicases. Band numbers correspond to those in Figure 6a. A “total score” is a value for the level of confidence in the protein identification, calculated by ProteinPilot. It can be converted to a percentage confidence score using the following formula:  $\text{ProtScore} = -\log(1 - \text{percentage confidence}/100)$ . As an approximate guide, ProteinPilot total scores give the following percentage levels of confidence; score  $>2$  ( $>99\%$  confidence), score  $>3$  ( $>99.9\%$  confidence). A “sequence coverage (%)” is a percentage of an identified protein that is covered by all matched peptides.
